# Supplementary material for: Emergency Etoposide-Cisplatin (Em-EP) for patients with germ cell tumours (GCT) and trophoblastic neoplasia (TN)
Source: PubMed Central journal article supplement (PMC6683367; doi:10.1186/s12885-019-5968-7), 2019-08-05

# Data Supplement

## Supp Fig 1

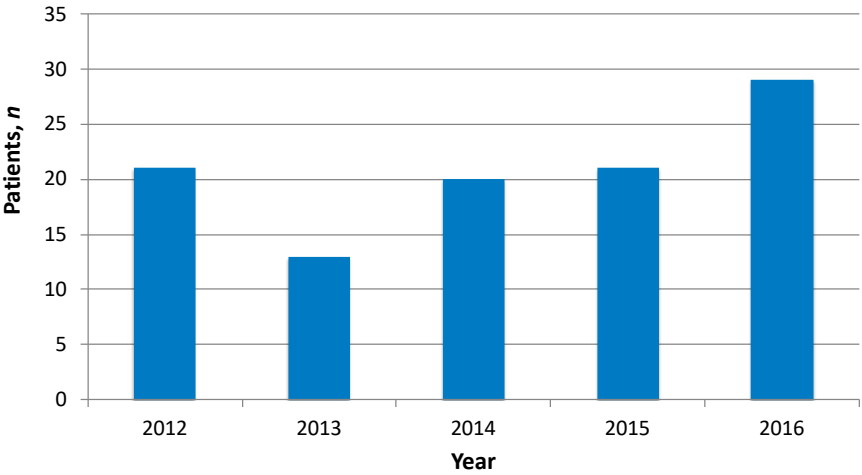

Supplement: 12885_2019_5968_MOESM1_ESM.pdf [file 12885_2019_5968_MOESM1_ESM.pdf]
